# Supplementary material
Source: HighWire-hosted journal article supplement (https://tobaccocontrol.bmj.com/content/26/e1/e49)
Supplement: inline-supplementary-material-3 [file inline-supplementary-material-3.pdf]

**Supplementary Table 3: Relative risk perceptions held by a majority of respondents, overall and for key subpopulations, by sampling method**

| Product comparison | Samples <sup>1</sup>          | Proportion of samples in which a majority of respondents held a particular perception of relative risk % (n) |               |         |                  |         |                         |                   |                      |
|--------------------|-------------------------------|--------------------------------------------------------------------------------------------------------------|---------------|---------|------------------|---------|-------------------------|-------------------|----------------------|
|                    |                               | Less                                                                                                         | Less or equal | Equal   | Equal or greater | Greater | Don't know <sup>2</sup> | None <sup>3</sup> | Unknown <sup>4</sup> |
| SLT vs. CCs (ref)  | Overall (n=77)                | <b>18 (14)</b>                                                                                               | 3 (2)         | 13 (10) | 6 (5)            | 0       | 0                       | 27 (21)           | 32 (25)              |
|                    | Prob-based samples (n=56)     | <b>21 (12)</b>                                                                                               | 0             | 13 (7)  | 5 (3)            | 0       | 0                       | 34 (19)           | 27 (15)              |
|                    | Non-prob-based samples (n=21) | <b>9.5 (2)</b>                                                                                               | 9.5 (2)       | 14 (3)  | 9.5 (2)          | 0       | 0                       | 48 (10)           | 9.5 (2)              |
|                    | Smokers (n=38)                | <b>13 (5)</b>                                                                                                | 0             | 11 (4)  | 5 (2)            | 0       | 0                       | 16 (6)            | 55 (21)              |
|                    | Prob-based samples (n=28)     | <b>14 (4)</b>                                                                                                | 0             | 14 (4)  | 4 (1)            | 0       | 0                       | 21 (6)            | 46 (13)              |
|                    | Non-prob-based samples (n=10) | <b>10 (1)</b>                                                                                                | 0             | 0       | 10 (1)           | 0       | 0                       | 0                 | 80 (8)               |
|                    | SLT users (n=13)              | <b>38 (5)</b>                                                                                                | 8 (1)         | 15 (2)  | 0                | 0       | 0                       | 31 (4)            | 8 (1)                |
|                    | Prob-based samples (n=12)     | <b>42 (5)</b>                                                                                                | 0             | 17 (2)  | 0                | 0       | 0                       | 33 (4)            | 8 (1)                |
|                    | Non-prob-based samples (n=1)  | <b>0</b>                                                                                                     | 100 (1)       | 0       | 0                | 0       | 0                       | 0                 | 0                    |
|                    | SLT non-users (n=6)           | <b>0</b>                                                                                                     | 17 (1)        | 0       | 0                | 0       | 0                       | 83 (5)            | 0                    |
|                    | Prob-based samples (n=5)      | <b>0</b>                                                                                                     | 0             | 0       | 0                | 0       | 0                       | 100 (5)           | 0                    |
|                    | Non-prob-based samples (n=1)  | <b>0</b>                                                                                                     | 100 (1)       | 0       | 0                | 0       | 0                       | 0                 | 0                    |
| ECs vs. CCs (ref)  | Overall (n=46)                | <b>70 (32)</b>                                                                                               | 0             | 0       | 0                | 0       | 4 (2)                   | 17 (8)            | 9 (4)                |
|                    | Prob-based samples (n=32)     | <b>56 (18)</b>                                                                                               | 0             | 0       | 0                | 0       | 6 (2)                   | 25 (8)            | 13 (4)               |
|                    | Non-prob-based samples (n=14) | <b>100 (14)</b>                                                                                              | 0             | 0       | 0                | 0       | 0                       | 0                 | 0                    |
|                    | General population (n=11)     | <b>64 (7)</b>                                                                                                | 0             | 0       | 0                | 0       | 0                       | 27 (3)            | 9 (1)                |
|                    | Prob-based samples (n=9)      | <b>56 (5)</b>                                                                                                | 0             | 0       | 0                | 0       | 0                       | 33 (3)            | 11 (1)               |
|                    | Non-prob-based samples (n=2)  | <b>100 (2)</b>                                                                                               | 0             | 0       | 0                | 0       | 0                       | 0                 | 0                    |
|                    | Smokers (n=16)                | <b>81 (13)</b>                                                                                               | 0             | 0       | 0                | 0       | 0                       | 19 (3)            | 0                    |
|                    | Prob-based samples (n=13)     | <b>77 (10)</b>                                                                                               | 0             | 0       | 0                | 0       | 0                       | 23 (3)            | 0                    |
|                    | Non-prob-based samples (n=3)  | <b>100 (3)</b>                                                                                               | 0             | 0       | 0                | 0       | 0                       | 0                 | 0                    |

|                          |                               |                |   |        |        |          |         |        |         |
|--------------------------|-------------------------------|----------------|---|--------|--------|----------|---------|--------|---------|
|                          | Non-smokers (n=2)             | <b>0</b>       | 0 | 0      | 0      | 0        | 50 (1)  | 0      | 50 (1)  |
|                          | Prob-based samples (n=2)      | <b>0</b>       | 0 | 0      | 0      | 0        | 50 (1)  | 0      | 50 (1)  |
|                          | Non-prob-based samples (n=0)  | -              | - | -      | -      | -        | -       | -      | -       |
|                          | EC users (n=16)               | <b>75 (12)</b> | 0 | 0      | 0      | 0        | 0       | 19 (3) | 6 (1)   |
|                          | Prob-based samples (n=7)      | <b>43 (3)</b>  | 0 | 0      | 0      | 0        | 0       | 43 (3) | 14 (1)  |
|                          | Non-prob-based samples (n=9)  | <b>100 (9)</b> | 0 | 0      | 0      | 0        | 0       | 0      | 0       |
|                          | EC non-users (n=1)            | <b>0</b>       | 0 | 0      | 0      | 0        | 100 (1) | 0      | 0       |
|                          | Prob-based samples (n=1)      | <b>0</b>       | 0 | 0      | 0      | 0        | 100 (1) | 0      | 0       |
|                          | Non-prob-based samples (n=0)  | -              | - | -      | -      | -        | -       | -      | -       |
| <b>NRT vs. CCs (ref)</b> | Overall (n=20)                | <b>35 (7)</b>  | 0 | 10 (2) | 5 (1)  | 0        | 0       | 0      | 50 (10) |
|                          | Prob-based samples (n=5)      | <b>0</b>       | 0 | 40 (2) | 0      | 0        | 0       | 0      | 60 (3)  |
|                          | Non-prob-based samples (n=15) | <b>47 (7)</b>  | 0 | 0      | 6 (1)  | 0        | 0       | 0      | 47 (7)  |
|                          | General population (n=4)      | <b>75 (3)</b>  | 0 | 0      | 25 (1) | 0        | 0       | 0      | 0       |
|                          | Prob-based samples (n=0)      | -              | - | -      | -      | -        | -       | -      | -       |
|                          | Non-prob-based samples (n=4)  | <b>75 (3)</b>  | 0 | 0      | 25 (1) | 0        | 0       | 0      | 0       |
|                          | Smokers (n=12)                | <b>25 (3)</b>  | 0 | 17 (2) | 0      | 0        | 0       | 0      | 58 (7)  |
|                          | Prob-based samples (n=3)      | <b>0</b>       | 0 | 66 (2) | 0      | 0        | 0       | 0      | 33 (1)  |
|                          | Non-prob-based samples (n=9)  | <b>33 (3)</b>  | 0 | 0      | 0      | 0        | 0       | 0      | 66 (6)  |
|                          | NRT users (n=2)               | <b>50 (1)</b>  | 0 | 0      | 0      | 0        | 0       | 0      | 50 (1)  |
|                          | Prob-based samples (n=1)      | <b>0</b>       | 0 | 0      | 0      | 0        | 0       | 0      | 100 (1) |
|                          | Non-prob-based samples (n=1)  | <b>100 (1)</b> | 0 | 0      | 0      | 0        | 0       | 0      | 0       |
|                          | NRT non-users (n=2)           | <b>0</b>       | 0 | 0      | 0      | 0        | 0       | 0      | 100 (2) |
|                          | Prob-based samples (n=1)      | <b>0</b>       | 0 | 0      | 0      | 0        | 0       | 0      | 100 (1) |
|                          | Non-prob-based samples (n=1)  | <b>0</b>       | 0 | 0      | 0      | 0        | 0       | 0      | 100 (1) |
| <b>SLT vs. NRT (ref)</b> | Overall (n=2)                 | <b>0</b>       | 0 | 0      | 0      | <b>0</b> | 100 (2) | 0      | 0       |

|                          |                              |   |   |   |   |          |         |         |   |
|--------------------------|------------------------------|---|---|---|---|----------|---------|---------|---|
|                          | Prob-based samples (n=2)     | 0 | 0 | 0 | 0 | <b>0</b> | 100 (2) | 0       | 0 |
|                          | Non-prob-based samples (n=0) | - | - | - | - | -        | -       | -       | - |
| <b>ECs vs. NRT (ref)</b> | Overall (n=1)                | 0 | 0 | 0 | 0 | <b>0</b> | 0       | 100 (1) | 0 |
|                          | Prob-based samples (n=1)     | 0 | 0 | 0 | 0 | <b>0</b> | 0       | 100 (1) | 0 |
|                          | Non-prob-based samples (n=0) | - | - | - | - | -        | -       | -       | - |

**Notes:** <sup>1</sup> Sample sizes reflect those studies for which quantitative comparable findings were reported. Samples from the following studies were excluded due to use of an incompatible measure: SLT vs. CCs [45]; ECs vs. CCs [69, 73]; ECs vs. NRT.[69]

<sup>2</sup> Denotes samples in which a majority of respondents reported not knowing the relative risk of given products.

<sup>3</sup> Denotes samples in which a particular perception of relative risk was not held by a majority of respondents.

<sup>4</sup> Denotes samples for which insufficient information was given to discern whether a majority of respondents held a particular perception of relative risk.

# Denotes findings which should be interpreted with caution, given limitations with available data.

Bolded results indicate the proportion of samples in which a majority of respondents held the epidemiologically correct perception of relative risk, for each product comparison.
